# Supplementary figures and images for: Beyond broadband: Towards a spectral decomposition of electroencephalography microstates
Source: PubMed Central journal article supplement — Hum Brain Mapp. 2022 Mar 24;43(10):3047–61. doi: 10.1002/hbm.25834 (PMC9188972; doi:10.1002/hbm.25834), 2022-03-24

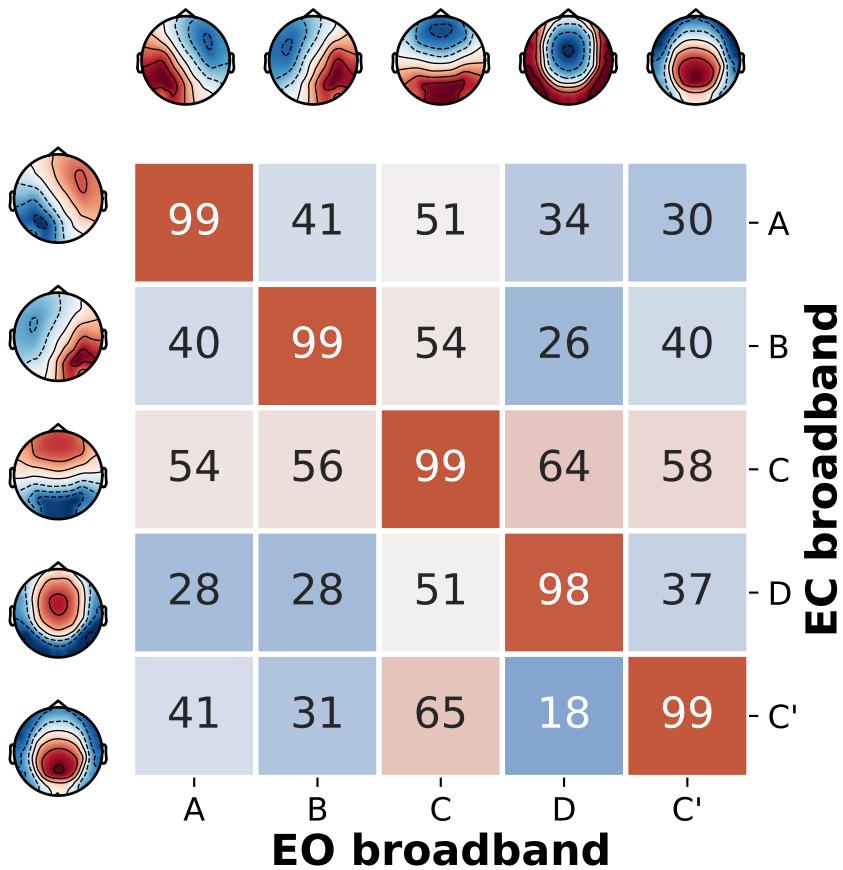

Supplement: HBM-43-3047-s002.pdf [file HBM-43-3047-s002.pdf]

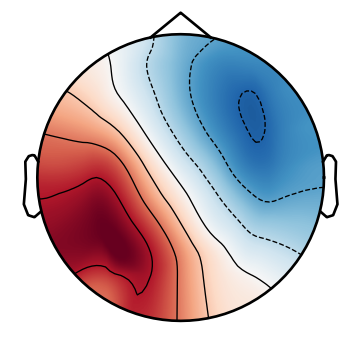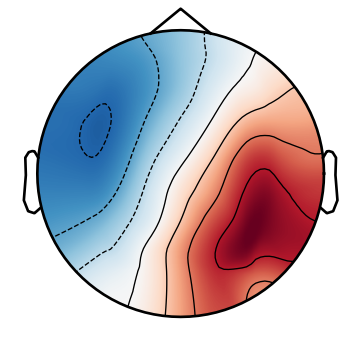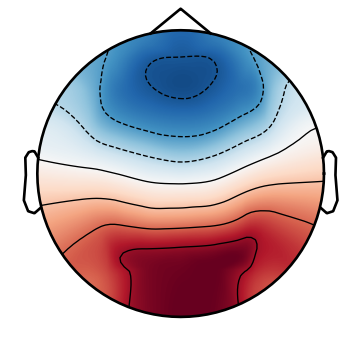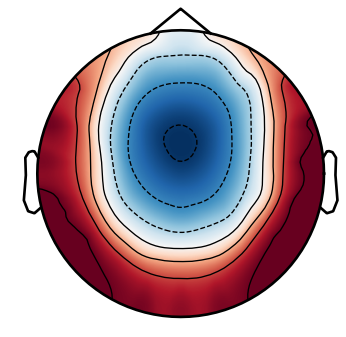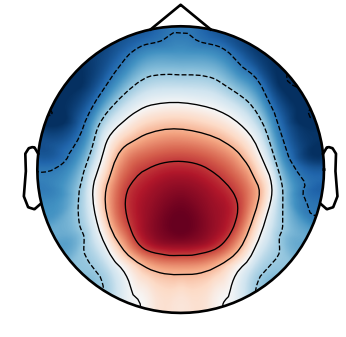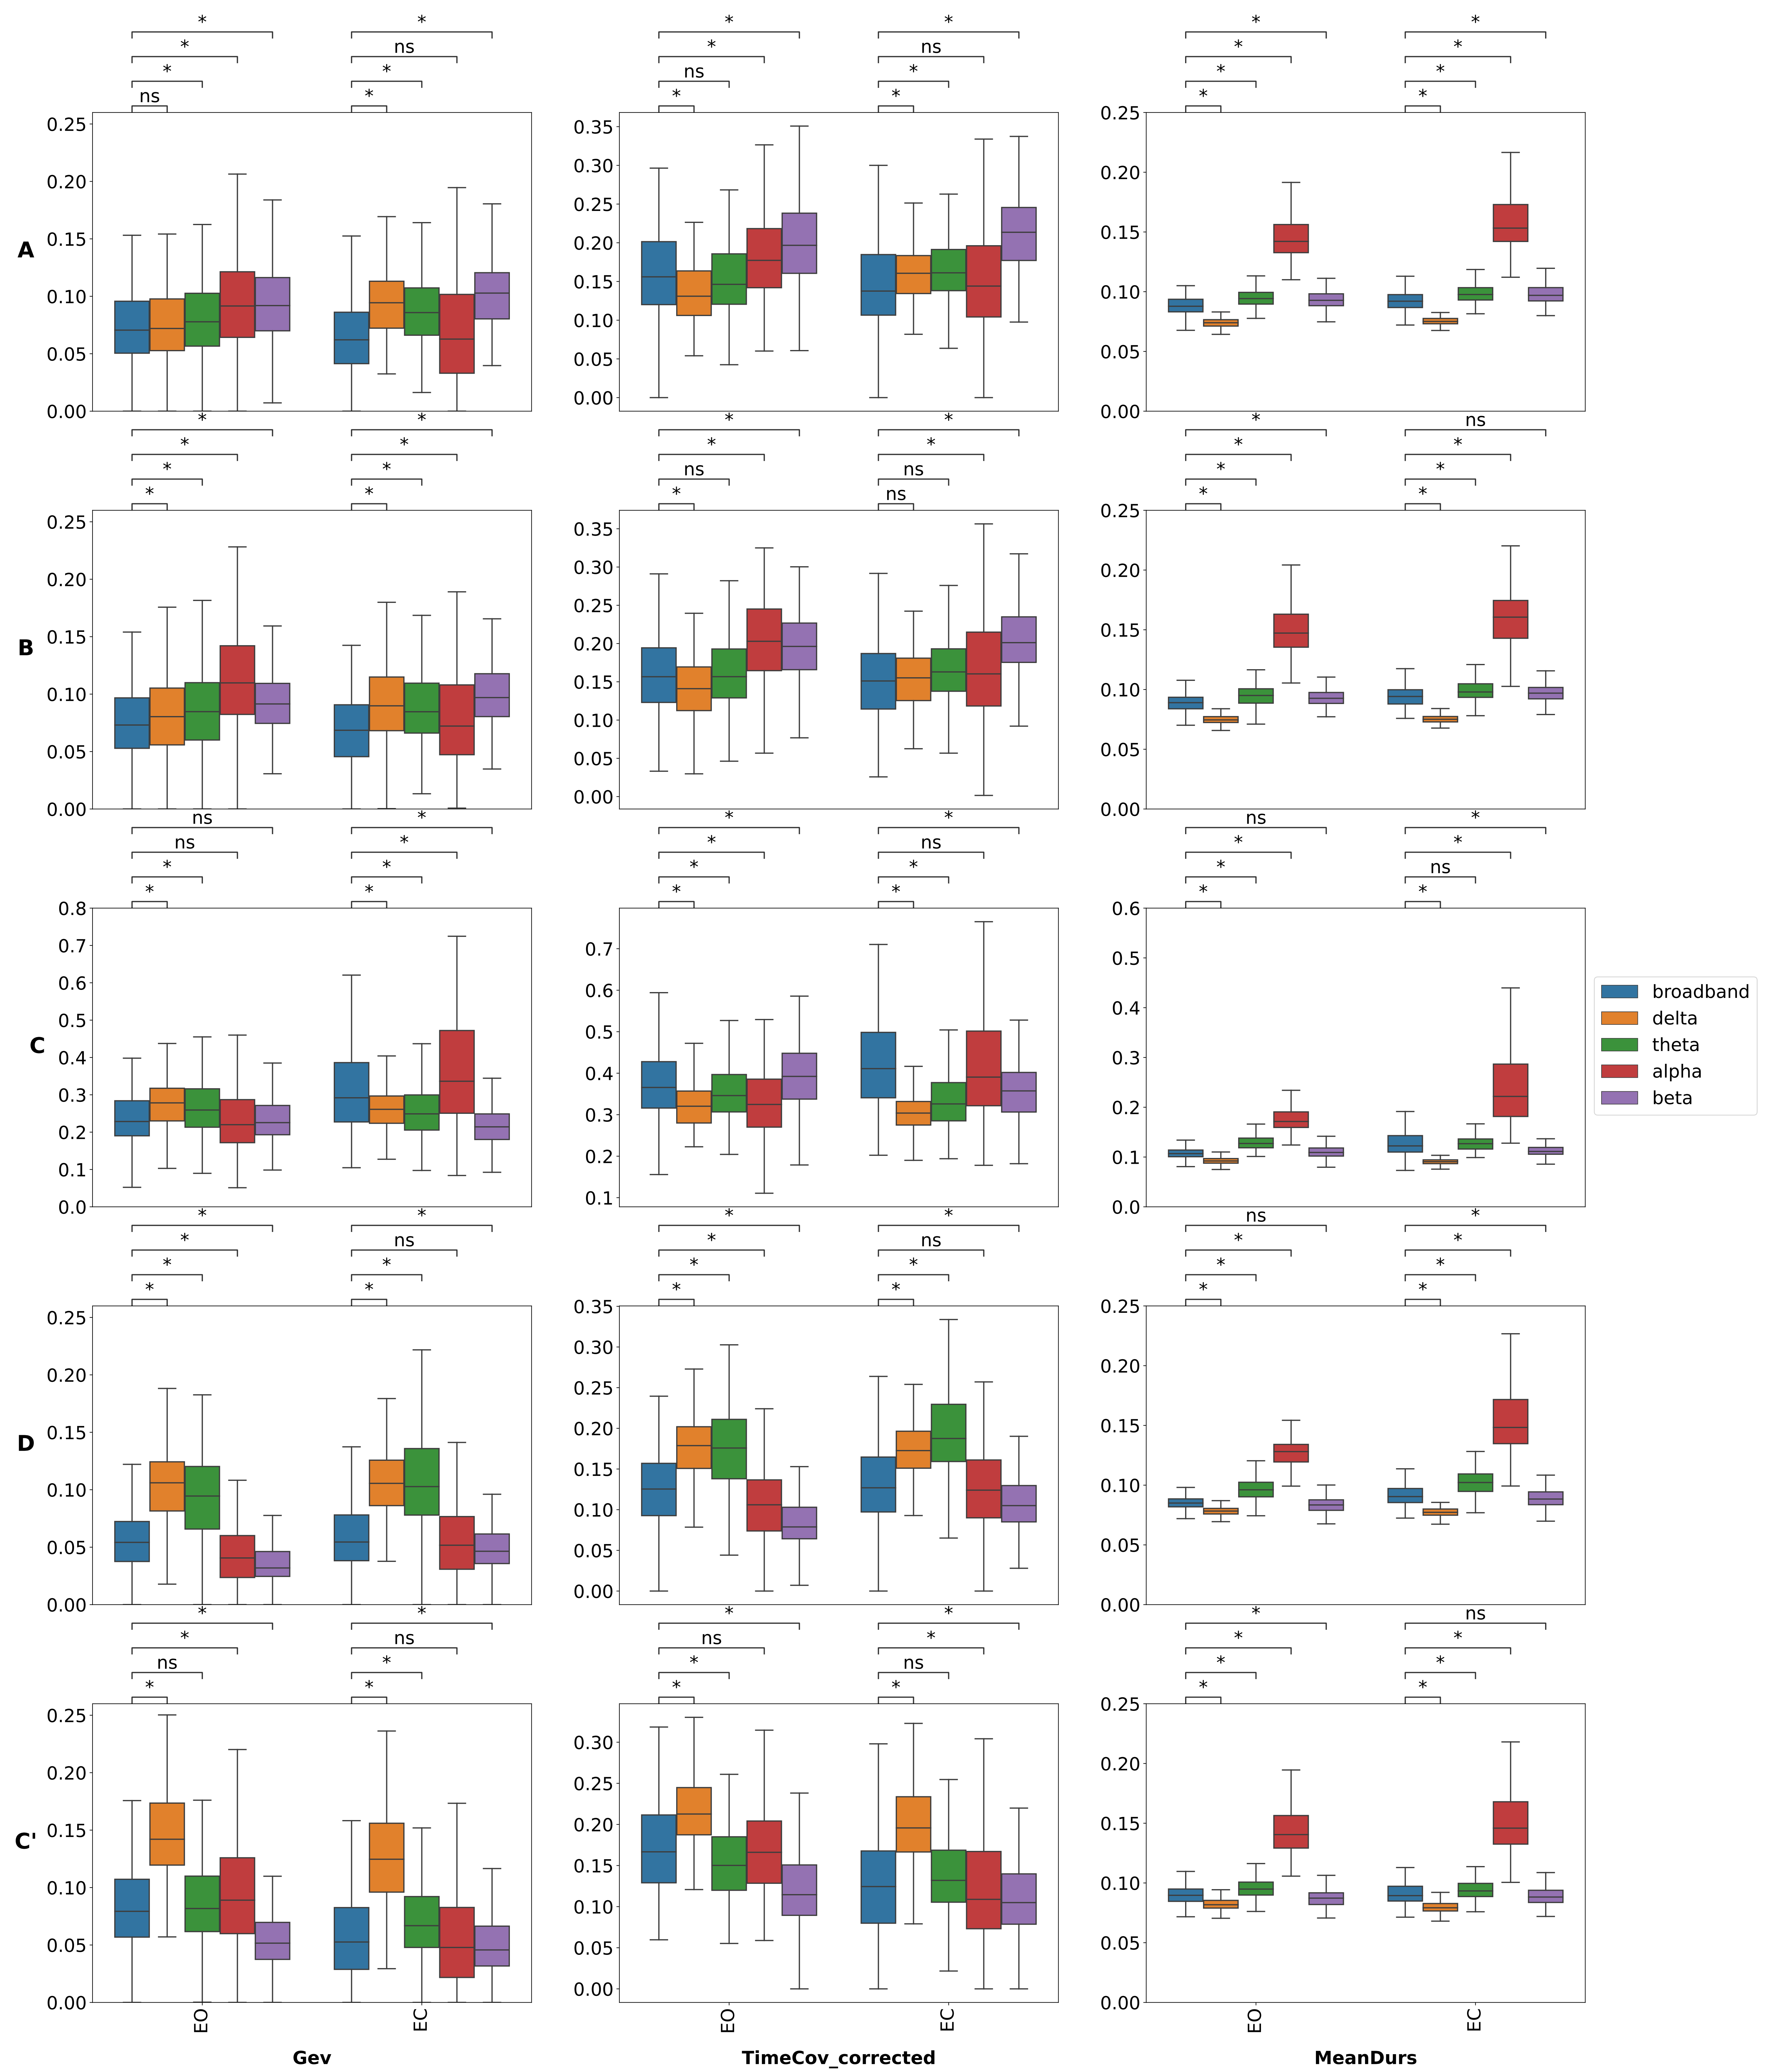

Supplement: HBM-43-3047-s005.pdf [file HBM-43-3047-s005.pdf]
